# Supplementary material for: Longitudinal discontinuities in riverine greenhouse gas dynamics generated by dams and urban wastewater
Source: Copernicus journal article supplement (doi:10.5194/bg-2018-278), 2018-06-13
Supplement: Supplementary file 1 [file bg-2018-278-supplement.pdf]

1 **Longitudinal discontinuities in riverine greenhouse gas dynamics**  
2 **generated by dams and urban wastewater**

3 Hyojin Jin<sup>1</sup>, Tae Kyung Yoon<sup>2</sup>, Most Shirina Begum<sup>1</sup>, Eun-Ju Lee<sup>3</sup>, Neung-Hwan Oh<sup>3</sup>, Namgoo  
4 Kang<sup>4,5</sup>, Ji-Hyung Park<sup>1</sup>

5 <sup>1</sup>Department of Environmental Science and Engineering, Ewha Womans University, Seoul 03760, Republic of Korea

6 <sup>2</sup>Division of Environmental Strategy, Korea Environment Institute, Sejong 30147, Republic of Korea

7 <sup>3</sup>Graduate School of Environmental Studies, Seoul National University, Seoul 08826, Republic of Korea

8 <sup>4</sup>Center for Gas Analysis, Korea Research Institute of Standards and Science, Daejeon 34113, Republic of Korea

9 <sup>5</sup>Science of Measurement, University of Science and Technology, Daejeon 34113, Republic of Korea

10 *Correspondence to:* Ji-Hyung Park (jhp@ewha.ac.kr); Namgoo Kang (nkang@kriss.re.kr)

11

12 **Supplementary Information**

13

14 **Contents:**

15 Supplementary tables:

16 Table S1; Table S2; Table S3; Table S4; Table S5; Table S6; Table S7; Table S8

17

18 Supplementary figure:

19 Fig. S1

20 **S1: Supplementary tables**

21 **Table S1.** Water quality data measured along the Han River by monthly monitoring from July 2014 to July 2015 (n = 11) and in an outlet of the urban tributary Joongnang (HR 12)  
 22 from May 2015 to December 2017 (n = 13).

| Site | pH             | DO<br>(mg L <sup>-1</sup> ) | EC<br>( $\mu$ S cm <sup>-1</sup> ) | DOC<br>(mg L <sup>-1</sup> ) | HIX            | FI             | SUVA <sub>254</sub><br>(L mg-C <sup>-1</sup> m <sup>-1</sup> ) | C1/<br>DOC     | C2/<br>DOC     | C3/<br>DOC     | NO <sub>3</sub> -N<br>(mg L <sup>-1</sup> ) | NH <sub>4</sub> -N<br>(mg L <sup>-1</sup> ) | PO <sub>4</sub> <sup>3-</sup><br>(mg L <sup>-1</sup> ) | Chl <i>a</i><br>( $\mu$ g L <sup>-1</sup> ) |
|------|----------------|-----------------------------|------------------------------------|------------------------------|----------------|----------------|----------------------------------------------------------------|----------------|----------------|----------------|---------------------------------------------|---------------------------------------------|--------------------------------------------------------|---------------------------------------------|
| HR1  | 6.85<br>(0.16) | 9.10<br>(1.49)              | 40<br>(5)                          | 1.18<br>(0.68)               | 7.67<br>(3.13) | 1.26<br>(0.04) | 3.72<br>(2.11)                                                 | 0.86<br>(0.18) | 0.98<br>(0.17) | 0.50<br>(0.08) | 1.48<br>(0.60)                              | 0.01<br>(0.02)                              | BDL                                                    | 0.85<br>(0.39)                              |
| HR2  | 7.33<br>(0.34) | 9.59<br>(1.74)              | 148<br>(41)                        | 1.33<br>(0.37)               | 4.32<br>(2.08) | 1.40<br>(0.06) | 2.58<br>(0.72)                                                 | 0.93<br>(0.19) | 1.29<br>(0.24) | 1.09<br>(0.36) | 4.02<br>(1.19)                              | 0.04<br>(0.04)                              | 0.03<br>(0.06)                                         | 3.63<br>(4.14)                              |
| HR4  | 7.31<br>(0.21) | 8.86<br>(1.64)              | 98<br>(20)                         | 1.36<br>(0.40)               | 4.43<br>(1.78) | 1.29<br>(0.03) | 3.03<br>(1.83)                                                 | 0.73<br>(0.20) | 0.96<br>(0.23) | 0.71<br>(0.12) | 1.92<br>(0.42)                              | 0.01<br>(0.02)                              | BDL                                                    | 6.75<br>(6.02)                              |
| HR8  | 7.43<br>(0.58) | 9.93<br>(1.78)              | 122<br>(19)                        | 1.61<br>(0.20)               | 2.70<br>(0.73) | 1.35<br>(0.02) | 1.89<br>(0.50)                                                 | 0.54<br>(0.15) | 0.83<br>(0.20) | 0.84<br>(0.11) | 1.54<br>(0.41)                              | 0.03<br>(0.05)                              | BDL                                                    | 6.26<br>(7.59)                              |
| HR11 | 7.77<br>(0.78) | 9.78<br>(1.47)              | 197<br>(41)                        | 1.83<br>(0.22)               | 2.24<br>(1.04) | 1.40<br>(0.04) | 2.18<br>(0.33)                                                 | 0.67<br>(0.18) | 1.05<br>(0.22) | 1.24<br>(0.25) | 2.15<br>(1.39)                              | 0.04<br>(0.04)                              | BDL                                                    | 9.81<br>(8.23)                              |
| HR12 | 6.71<br>(0.33) | 5.97<br>(1.38)              | 538<br>(95)                        | 4.40<br>(0.70)               | 2.05<br>(0.88) | 1.70<br>(0.08) | 2.13<br>(0.33)                                                 | 1.32<br>(0.17) | 2.31<br>(0.38) | 3.51<br>(0.74) | 6.82<br>(1.45)                              | 3.99<br>(2.13)                              | 1.14<br>(1.35)                                         | 5.78<br>(2.70)                              |
| HR14 | 7.42<br>(0.35) | 8.52<br>(1.93)              | 263<br>(69)                        | 2.35<br>(0.28)               | 2.06<br>(0.70) | 1.53<br>(0.06) | 2.19<br>(0.30)                                                 | 0.86<br>(0.13) | 1.41<br>(0.17) | 1.80<br>(0.29) | 2.47<br>(0.75)                              | 0.54<br>(0.25)                              | 0.38<br>(0.19)                                         | 27.32<br>(28.29)                            |

23 Values below detection limits are indicated by BDL. The numbers in parentheses indicate one standard deviation.

24

25 **Table S2.** Summary of water quality data measured during the wet-season survey along the Han River in July 2014.

| Site | pH   | DO<br>(mg L <sup>-1</sup> ) | EC<br>( $\mu$ S cm <sup>-1</sup> ) | DOC<br>(mg L <sup>-1</sup> ) | HIX   | FI   | SUVA <sub>254</sub><br>(L mg-C <sup>-1</sup> m <sup>-1</sup> ) | C1/<br>DOC | C2/<br>DOC | C3<br>/DOC | NO <sub>3</sub> -N<br>(mg L <sup>-1</sup> ) | NH <sub>4</sub> -N<br>(mg L <sup>-1</sup> ) | PO <sub>4</sub> <sup>3-</sup><br>(mg L <sup>-1</sup> ) | Chl <i>a</i><br>( $\mu$ g L <sup>-1</sup> ) |
|------|------|-----------------------------|------------------------------------|------------------------------|-------|------|----------------------------------------------------------------|------------|------------|------------|---------------------------------------------|---------------------------------------------|--------------------------------------------------------|---------------------------------------------|
| HR1  | 6.80 | 8.85                        | 40                                 | 2.49                         | 10.44 | 1.32 | 9.85                                                           | 1.13       | 1.27       | 0.56       | 1.98                                        | BDL                                         | BDL                                                    | ND                                          |
| HR2  | 7.44 | 8.22                        | 100                                | 1.73                         | 6.18  | 1.34 | 3.55                                                           | 1.10       | 1.39       | 0.83       | 3.07                                        | 0.06                                        | 0.14                                                   | ND                                          |
| HR3  | 7.57 | 7.1                         | 75                                 | 2.08                         | 5.83  | 1.27 | 4.01                                                           | 1.02       | 1.26       | 0.80       | 1.20                                        | 0.07                                        | BDL                                                    | 20.40                                       |
| HR4  | 7.22 | 7.55                        | 91                                 | 1.83                         | 5.77  | 1.28 | 8.40                                                           | 1.17       | 1.49       | 0.96       | 1.80                                        | 0.06                                        | BDL                                                    | 16.60                                       |
| HR5  | 8.44 | 8.33                        | 74                                 | 1.24                         | 1.59  | 1.29 | 1.37                                                           | 0.20       | 0.33       | 0.54       | 1.31                                        | BDL                                         | BDL                                                    | 1.60                                        |
| HR6  | 8.01 | 8.7                         | 19                                 | 1.60                         | 2.00  | 1.42 | 2.10                                                           | 0.62       | 1.11       | 1.75       | 1.50                                        | 0.07                                        | BDL                                                    | 3.90                                        |
| HR7  | 7.6  | 10.31                       | 105                                | 1.46                         | 1.65  | 1.36 | 2.18                                                           | 0.61       | 1.15       | 2.03       | 1.22                                        | BDL                                         | BDL                                                    | 13.50                                       |
| HR8  | 8.83 | 11.27                       | 106                                | 1.73                         | 2.74  | 1.34 | 1.87                                                           | 0.49       | 0.73       | 0.83       | 1.30                                        | BDL                                         | BDL                                                    | 6.80                                        |
| HR9  | 9.07 | 10.5                        | 217                                | 2.02                         | 1.91  | 1.37 | 2.51                                                           | 0.78       | 1.40       | 2.48       | 1.14                                        | BDL                                         | BDL                                                    | 34.40                                       |
| HR10 | 9.27 | 13.03                       | 223                                | 1.97                         | 2.80  | 1.37 | 2.19                                                           | 0.68       | 1.12       | 1.41       | 0.93                                        | BDL                                         | BDL                                                    | 7.70                                        |
| HR11 | 7.78 | 9.68                        | 179                                | 1.81                         | 2.43  | 1.39 | 1.96                                                           | 0.64       | 1.02       | 1.15       | 1.20                                        | BDL                                         | BDL                                                    | 32.00                                       |
| HR12 | 6.89 | 2.2                         | 505                                | 4.39                         | 1.50  | 1.81 | 1.99                                                           | 1.37       | 2.27       | 3.55       | 4.42                                        | 4.06                                        | 1.31                                                   | 17.80                                       |
| HR13 | 7.06 | 7.6                         | 236                                | 1.98                         | 2.10  | 1.53 | 2.08                                                           | 0.89       | 1.53       | 1.89       | 1.69                                        | 0.25                                        | 0.26                                                   | 10.10                                       |
| HR14 | 6.95 | 7                           | 221                                | 2.15                         | 2.33  | 1.51 | 2.11                                                           | 0.92       | 1.49       | 1.73       | 1.61                                        | 0.46                                        | 0.61                                                   | 26.00                                       |
| HR15 | 7.06 | 6.3                         | 558                                | 2.32                         | 0.76  | 1.49 | 2.25                                                           | 1.11       | 1.88       | 4.72       | 0.25                                        | 276.08                                      | BDL                                                    | 42.20                                       |

26 Values below detection limits are indicated by BDL, while ND refers to values not determined.

27

28 **Table S3.** Summary of water quality data measured during dry-season survey along the Han River in May 2015.

| Site | pH   | DO<br>(mg L <sup>-1</sup> ) | EC<br>( $\mu$ S cm <sup>-1</sup> ) | DOC<br>(mg L <sup>-1</sup> ) | HIX  | FI   | SUVA <sub>254</sub><br>(L mg-C <sup>-1</sup> m <sup>-1</sup> ) | C1/<br>DOC | C2/<br>DOC | C3/<br>DOC | NO <sub>3</sub> -N<br>(mg L <sup>-1</sup> ) | NH <sub>4</sub> -N<br>(mg L <sup>-1</sup> ) | PO <sub>4</sub> <sup>3-</sup><br>(mg L <sup>-1</sup> ) | Chl <i>a</i><br>( $\mu$ g L <sup>-1</sup> ) |
|------|------|-----------------------------|------------------------------------|------------------------------|------|------|----------------------------------------------------------------|------------|------------|------------|---------------------------------------------|---------------------------------------------|--------------------------------------------------------|---------------------------------------------|
| HR1  | 6.98 | 9.94                        | 39                                 | 0.95                         | 8.19 | 1.22 | 3.32                                                           | 0.97       | 1.06       | 0.49       | 1.60                                        | BDL                                         | BDL                                                    | BDL                                         |
| HR2  | 8.00 | 10.57                       | 159                                | 1.22                         | 4.32 | 1.37 | 2.56                                                           | 0.93       | 1.30       | 1.02       | 4.06                                        | BDL                                         | BDL                                                    | 9.13                                        |
| HR3  | 7.90 | 9.02                        | 85                                 | 1.23                         | 3.29 | 1.32 | 2.55                                                           | 0.68       | 0.91       | 0.94       | 1.23                                        | 0.03                                        | BDL                                                    | 2.03                                        |
| HR4  | 7.42 | 8.06                        | 99                                 | 1.04                         | 3.81 | 1.28 | 2.44                                                           | 0.68       | 0.94       | 0.77       | 1.89                                        | BDL                                         | BDL                                                    | 0.75                                        |
| HR5  | 7.60 | 10.00                       | 85                                 | 1.20                         | 3.17 | 1.34 | 1.86                                                           | 0.44       | 0.68       | 0.60       | 1.52                                        | BDL                                         | BDL                                                    | 0.66                                        |
| HR6  | 8.61 | 9.90                        | 121                                | 1.67                         | 2.06 | 1.43 | 1.73                                                           | 0.47       | 0.75       | 1.10       | 1.64                                        | BDL                                         | BDL                                                    | 10.34                                       |
| HR7  | 6.76 | 9.60                        | 122                                | 1.37                         | 2.89 | 1.40 | 1.94                                                           | 0.54       | 0.82       | 0.86       | 1.84                                        | 0.05                                        | BDL                                                    | 1.65                                        |
| HR8  | 7.24 | 7.37                        | 124                                | 1.35                         | 2.38 | 1.33 | 1.93                                                           | 0.49       | 0.76       | 0.85       | 1.94                                        | BDL                                         | BDL                                                    | 3.62                                        |
| HR9  | 8.30 | 11.42                       | 247                                | 1.69                         | 2.82 | 1.44 | 2.02                                                           | 0.61       | 0.96       | 1.00       | 1.96                                        | BDL                                         | BDL                                                    | 10.43                                       |
| HR10 | 9.00 | 11.60                       | 198                                | 1.73                         | 2.57 | 1.39 | 2.03                                                           | 0.53       | 0.84       | 0.96       | 1.88                                        | BDL                                         | BDL                                                    | 5.83                                        |
| HR11 | 7.50 | 7.88                        | 184                                | 1.62                         | 2.32 | 1.39 | 2.00                                                           | 0.58       | 0.93       | 1.07       | 1.96                                        | 0.04                                        | BDL                                                    | 5.96                                        |
| HR12 | 6.97 | 3.47                        | 578                                | 5.14                         | 1.37 | 1.77 | 1.99                                                           | 1.23       | 2.14       | 3.49       | 5.80                                        | 6.49                                        | 1.88                                                   | 7.42                                        |
| HR13 | 7.52 | 7.64                        | 272                                | 2.27                         | 1.70 | 1.55 | 2.07                                                           | 0.79       | 1.32       | 1.84       | 2.34                                        | 0.80                                        | 0.13                                                   | 11.08                                       |
| HR14 | 7.50 | 8.70                        | 281                                | 2.32                         | 1.55 | 1.57 | 1.97                                                           | 0.76       | 1.26       | 1.88       | 2.12                                        | 0.81                                        | 0.27                                                   | 85.10                                       |
| HR15 | 7.34 | 6.24                        | 170                                | 2.41                         | 0.81 | 1.50 | 1.80                                                           | 0.75       | 1.32       | 2.62       | 1.91                                        | 111.83                                      | 0.09                                                   | 3.43                                        |

29 Values below detection limits are indicated by BDL, while ND refers to values not determined.

30 **Table S4.** Summary of Kendall rank correlation ( $\tau$ ) between all the measurements of GHGs and water quality parameters  
 31 in the upper, middle, and lower reaches of the Han River.

|                        | $p\text{CO}_2$ |              |              | $\text{CH}_4$ |             |              | $\text{N}_2\text{O}$ |             |              |
|------------------------|----------------|--------------|--------------|---------------|-------------|--------------|----------------------|-------------|--------------|
|                        | Upper          | Middle       | Lower        | Upper         | Middle      | Lower        | Upper                | Middle      | Lower        |
| pH                     | -0.19          | <b>-0.64</b> | <b>-0.42</b> | <b>0.47</b>   | 0.24        | -0.21        | -0.02                | -0.13       | 0.20         |
| DO                     | -0.20          | -0.20        | <b>-0.64</b> | 0.05          | -0.04       | <b>-0.27</b> | 0.25                 | -0.04       | 0.11         |
| Water Temp.            | 0.10           | <b>-0.24</b> | <b>0.40</b>  | 0.28          | <b>0.34</b> | <b>0.30</b>  | -0.14                | -0.13       | <b>-0.28</b> |
| EC                     | 0.20           | -0.21        | -0.03        | <b>0.42</b>   | 0.12        | 0.03         | <b>0.36</b>          | -0.08       | <b>0.56</b>  |
| DOC                    | -0.05          | -0.13        | 0.10         | 0.15          | <b>0.31</b> | 0.17         | 0.05                 | 0.00        | <b>0.56</b>  |
| TSS                    | 0.16           | -0.13        | <b>0.24</b>  | <b>0.52</b>   | 0.15        | 0.08         | 0.24                 | 0.11        | 0.12         |
| TA                     | <b>0.33</b>    | <b>-0.24</b> | -0.08        | <b>0.51</b>   | 0.29        | 0.00         | <b>0.40</b>          | -0.01       | <b>0.66</b>  |
| $\text{Na}^+$          | 0.23           | <b>-0.41</b> | -0.06        | <b>0.52</b>   | <b>0.33</b> | 0.10         | 0.22                 | -0.07       | <b>0.61</b>  |
| $\text{NH}_4\text{-N}$ | 0.16           | 0.25         | 0.13         | 0.27          | 0.16        | 0.21         | 0.32                 | 0.14        | <b>0.73</b>  |
| $\text{K}^+$           | 0.14           | <b>-0.28</b> | 0.06         | <b>0.51</b>   | <b>0.35</b> | 0.06         | 0.11                 | -0.04       | <b>0.67</b>  |
| $\text{Ca}^{2+}$       | 0.21           | -0.23        | 0.01         | <b>0.53</b>   | <b>0.36</b> | 0.04         | 0.27                 | -0.09       | <b>0.48</b>  |
| $\text{Mg}^{2+}$       | 0.17           | <b>-0.28</b> | -0.07        | <b>0.53</b>   | <b>0.33</b> | -0.01        | 0.22                 | -0.14       | <b>0.61</b>  |
| $\text{F}^-$           | 0.06           | 0.00         | <b>0.26</b>  | -0.30         | <b>0.34</b> | 0.20         | -0.06                | 0.13        | <b>-0.23</b> |
| $\text{Cl}^-$          | 0.12           | <b>-0.33</b> | -0.01        | <b>0.54</b>   | <b>0.44</b> | 0.09         | 0.26                 | -0.04       | <b>0.58</b>  |
| $\text{Br}^-$          | <b>0.27</b>    | -0.16        | <b>0.28</b>  | 0.20          | 0.19        | -0.05        | 0.21                 | -0.10       | -0.15        |
| $\text{NO}_3\text{-N}$ | 0.18           | 0.08         | <b>-0.23</b> | 0.28          | 0.15        | 0.01         | <b>0.42</b>          | 0.14        | <b>0.49</b>  |
| $\text{PO}_4^{3-}$     | 0.16           | 1.00         | <b>0.47</b>  | 1.00          | 1.00        | <b>0.36</b>  | 1.00                 | 1.00        | 0.13         |
| $\text{SO}_4^{2-}$     | 0.03           | <b>-0.24</b> | 0.07         | <b>0.45</b>   | 0.26        | -0.05        | 0.05                 | -0.10       | <b>0.51</b>  |
| FI                     | <b>0.26</b>    | -0.13        | -0.07        | <b>0.53</b>   | 0.25        | 0.11         | <b>0.41</b>          | <b>0.34</b> | <b>0.67</b>  |
| HIX                    | -0.07          | <b>0.31</b>  | <b>0.23</b>  | -0.29         | -0.10       | 0.04         | -0.10                | 0.05        | <b>-0.49</b> |
| $\text{SUVA}_{254}$    | -0.08          | 0.23         | <b>0.28</b>  | -0.25         | 0.00        | 0.19         | -0.21                | 0.13        | <b>-0.40</b> |
| C1/DOC                 | 0.11           | <b>0.27</b>  | <b>0.62</b>  | -0.01         | -0.05       | <b>0.38</b>  | 0.11                 | 0.17        | -0.11        |
| C2/DOC                 | 0.21           | <b>0.26</b>  | <b>0.61</b>  | 0.19          | -0.07       | <b>0.36</b>  | 0.15                 | 0.16        | 0.08         |
| C3/DOC                 | 0.19           | -0.14        | 0.00         | <b>0.47</b>   | 0.16        | 0.09         | <b>0.33</b>          | 0.19        | <b>0.66</b>  |
| Chl <i>a</i>           | -0.16          | -0.11        | <b>-0.27</b> | 0.19          | 0.25        | 0.05         | -0.05                | -0.03       | 0.21         |

32 All data collected in two basin-wide surveys, monthly samplings, a cruise, and tributary samplings were analyzed  
 33 separately for each of three reaches. Significant correlations at  $P < 0.05$  are indicated by bold numbers.

**Table S5.** Summary of three GHGs and water quality data measured along the tributary Joongnang (JN; HR12) during two synoptic samplings.

| Site                      | Coordinates    | Distance from the confluence (km) | $p\text{CO}_2$ ( $\mu\text{atm}$ ) | $\text{CH}_4$ ( $\text{nmol L}^{-1}$ ) | $\text{N}_2\text{O}$ ( $\text{nmol L}^{-1}$ ) | pH   | DO ( $\text{mg L}^{-1}$ ) | EC ( $\mu\text{S cm}^{-1}$ ) | DOC ( $\text{mg L}^{-1}$ ) | HIX  | FI   | SUVA <sub>254</sub> ( $\text{L mg}^{-1} \text{C}^{-1} \text{m}^{-1}$ ) | C1/DOC | C2/DOC | C3/DOC | $\text{NO}_3\text{-N}$ ( $\text{mg L}^{-1}$ ) | $\text{NH}_4\text{-N}$ ( $\text{mg L}^{-1}$ ) | $\text{PO}_4^{3-}$ ( $\text{mg L}^{-1}$ ) |
|---------------------------|----------------|-----------------------------------|------------------------------------|----------------------------------------|-----------------------------------------------|------|---------------------------|------------------------------|----------------------------|------|------|------------------------------------------------------------------------|--------|--------|--------|-----------------------------------------------|-----------------------------------------------|-------------------------------------------|
| <i>November 2015</i>      |                |                                   |                                    |                                        |                                               |      |                           |                              |                            |      |      |                                                                        |        |        |        |                                               |                                               |                                           |
| Forested headwater stream | 37°48', 127°1' | 36                                | 2759                               | 4.7                                    | 25.8                                          | 6.53 | 8.88                      | 71                           | 0.97                       | 3.41 | 1.33 | 2.30                                                                   | 0.68   | 0.79   | 0.50   | 3.19                                          | BDL                                           | BDL                                       |
| Peri-urban                | 37°48', 127°2' | 34                                | 2151                               | 713.7                                  | 44.1                                          | 6.63 | 8.51                      | 276                          | 2.12                       | 4.73 | 1.37 | 2.61                                                                   | 0.96   | 1.22   | 1.21   | 2.64                                          | 0.26                                          | 0.24                                      |
| Peri-urban                | 37°46', 127°2' | 31                                | 4160                               | 65.8                                   | 75.8                                          | 4.20 | 8.03                      | 355                          | 2.07                       | 3.99 | 1.48 | 2.26                                                                   | 1.11   | 1.69   | 1.30   | 2.80                                          | 0.12                                          | 0.21                                      |
| Urban                     | 37°44', 127°3' | 26                                | 3785                               | 5436.8                                 | 88.4                                          | 7.20 | 7.03                      | 440                          | 3.82                       | 2.02 | 1.55 | 1.99                                                                   | 1.21   | 1.87   | 2.69   | 3.56                                          | 1.66                                          | 0.50                                      |
| Urban                     | 37°41', 127°3' | 20                                | 3400                               | 279.2                                  | 56.6                                          | 6.13 | 8.40                      | 517                          | 3.15                       | 2.43 | 1.67 | 2.10                                                                   | 1.36   | 2.46   | 2.95   | 5.63                                          | 0.30                                          | BDL                                       |
| Urban                     | 37°38', 127°3' | 14                                | 3610                               | 5837.7                                 | 65.3                                          | 6.44 | 5.40                      | 592                          | 3.67                       | 1.82 | 1.63 | 2.14                                                                   | 1.17   | 1.90   | 2.79   | 3.89                                          | 1.91                                          | 0.32                                      |
| Urban                     | 37°34', 127°4' | 7                                 | 1952                               | 1827.8                                 | 32.0                                          | 7.04 | 7.00                      | 515                          | 2.47                       | 2.30 | 1.65 | 2.10                                                                   | 1.08   | 1.95   | 2.19   | 5.10                                          | 0.13                                          | BDL                                       |
| WWTP                      | 37°33', 127°3' | 4                                 | 11758                              | 424.9                                  | 487.0                                         | 6.72 | 6.88                      | 663                          | 5.03                       | 1.42 | 1.77 | 2.07                                                                   | 1.44   | 2.59   | 3.72   | 7.31                                          | 6.41                                          | 4.38                                      |
| Urban                     | 37°33', 127°2' | 2                                 | 8219                               | 1170.9                                 | 400.1                                         | 6.70 | 5.81                      | 607                          | 4.21                       | 1.46 | 1.74 | 2.02                                                                   | 1.31   | 2.38   | 3.46   | 7.00                                          | 3.67                                          | 3.48                                      |
| <i>May 2016</i>           |                |                                   |                                    |                                        |                                               |      |                           |                              |                            |      |      |                                                                        |        |        |        |                                               |                                               |                                           |
| Forested headwater stream | 37°48', 127°1' | 36                                | 1239                               | 10.0                                   | 15.7                                          | 6.07 | 10.15                     | 58                           | 0.56                       | 5.88 | 1.36 | 2.17                                                                   | 0.67   | 0.91   | 0.50   | 2.69                                          | 0.03                                          | BDL                                       |
| Peri-urban                | 37°48', 127°2' | 34                                | 1142                               | 101.9                                  | 19.8                                          | 6.56 | 9.07                      | 151                          | 1.14                       | 4.71 | 1.31 | 2.70                                                                   | 0.98   | 1.24   | 0.95   | 2.57                                          | 0.06                                          | BDL                                       |
| Peri-urban                | 37°46', 127°2' | 31                                | 2987                               | 80.2                                   | 46.2                                          | 7.02 | 7.30                      | 273                          | 1.66                       | 3.52 | 1.49 | 2.39                                                                   | 1.11   | 1.63   | 1.36   | 2.44                                          | 0.14                                          | BDL                                       |
| Urban                     | 37°44', 127°3' | 26                                | 1712                               | 495.9                                  | 26.4                                          | 7.39 | 8.80                      | 349                          | 2.08                       | 2.57 | 1.53 | 2.26                                                                   | 1.02   | 1.62   | 1.84   | 3.28                                          | 0.19                                          | BDL                                       |
| Urban                     | 37°41', 127°3' | 20                                | 6192                               | 353.2                                  | 98.1                                          | 6.63 | 7.65                      | 431                          | 2.69                       | 1.82 | 1.63 | 2.29                                                                   | 1.08   | 1.96   | 2.77   | 5.22                                          | 0.48                                          | 0.22                                      |
| Urban                     | 37°38', 127°3' | 14                                | 1489                               | 2746.2                                 | 39.2                                          | 7.37 | 7.50                      | 421                          | 2.50                       | 1.97 | 1.56 | 2.53                                                                   | 0.98   | 1.70   | 2.27   | 4.89                                          | 0.37                                          | 0.18                                      |
| Urban                     | 37°34', 127°4' | 7                                 | 2667                               | 5198.2                                 | 23.0                                          | 7.07 | 7.70                      | 405                          | 2.42                       | 2.02 | 1.60 | 2.42                                                                   | 1.03   | 1.80   | 2.30   | 4.68                                          | 0.46                                          | BDL                                       |
| WWTP                      | 37°33', 127°3' | 4                                 | 11827                              | 1908.0                                 | 285.7                                         | 6.00 | 6.61                      | 631                          | 4.64                       | 1.21 | 1.71 | 2.16                                                                   | 1.44   | 2.67   | 4.44   | 7.20                                          | 9.57                                          | 0.32                                      |
| Urban                     | 37°33', 127°2' | 2                                 | 8598                               | 2488.9                                 | 218.5                                         | 6.70 | 6.49                      | 536                          | 3.90                       | 1.16 | 1.72 | 2.17                                                                   | 1.16   | 2.16   | 3.81   | 6.50                                          | 5.10                                          | 0.26                                      |

35 Values below detection limits are indicated by BDL.

36 **Table S6.**  $\delta^{13}\text{C}$  and  $\Delta^{14}\text{C}$  measured in the dissolved organic matter collected along the Han River (HR1, HR4, HR8, HR11, HR14),  
 37 the urban tributary Joongnang (JN), and wastewater treatment plant (WWTP) effluents.

| Site             | Age<br>(years B.P.) | $\Delta^{14}\text{C}_{\text{DOC}}$ (‰) | $\delta^{13}\text{C}_{\text{DOC}}$ (‰) |
|------------------|---------------------|----------------------------------------|----------------------------------------|
| <i>July 2014</i> |                     |                                        |                                        |
| HR1              | Modern              | 58.91                                  | -28.16                                 |
| HR4              | 115                 | -22.08                                 | -26.09                                 |
| HR8              | 300                 | -43.92                                 | -21.51                                 |
| HR11             | Modern              | 66.84                                  | -26.41                                 |
| HR12 (JN)        | 1050                | -129.07                                | -24.98                                 |
| HR14             | 590                 | -78.21                                 | -20.58                                 |
| WWTP effluent    | 765                 | -97.87                                 | -25.75                                 |
| <i>May 2015</i>  |                     |                                        |                                        |
| HR1              | 180                 | -29.56                                 | -28.16                                 |
| HR4              | 635                 | -83.24                                 | -20.34                                 |
| HR8              | 350                 | -49.91                                 | -26.91                                 |
| HR11             | 540                 | -72.30                                 | -26.79                                 |
| HR12 (JN)        | 850                 | -107.61                                | -23.61                                 |
| HR14             | 675                 | -87.87                                 | -23.18                                 |
| WWTP effluent    | 905                 | -113.48                                | -25.79                                 |

38

**Table S7.** Summary of three GHGs and water quality data measured along the lower Han River during a boat cruise in June 2016.

| Coordinates          | Distance<br>to mouth<br>(km) | $p\text{CO}_2$      | $\text{CH}_4$            | $\text{N}_2\text{O}$     | pH   | DO                     | EC                        | DOC                    | HIX  | FI   | SUVA <sub>254</sub>                    | C1/<br>DOC             | C2/<br>DOC             | C3/<br>DOC             | $\text{NO}_3\text{-N}$   | $\text{NH}_4\text{-N}$ | $\text{PO}_4^{3-}$ | Chl <i>a</i> |  |
|----------------------|------------------------------|---------------------|--------------------------|--------------------------|------|------------------------|---------------------------|------------------------|------|------|----------------------------------------|------------------------|------------------------|------------------------|--------------------------|------------------------|--------------------|--------------|--|
|                      |                              | ( $\mu\text{atm}$ ) | ( $\text{nmol L}^{-1}$ ) | ( $\text{nmol L}^{-1}$ ) |      | ( $\text{mg L}^{-1}$ ) | ( $\mu\text{S cm}^{-1}$ ) | ( $\text{mg L}^{-1}$ ) |      |      | ( $\text{L mg-C}^{-1} \text{m}^{-1}$ ) | ( $\text{mg L}^{-1}$ ) | ( $\text{mg L}^{-1}$ ) | ( $\text{mg L}^{-1}$ ) | ( $\mu\text{g L}^{-1}$ ) |                        |                    |              |  |
| Mainstem             |                              |                     |                          |                          |      |                        |                           |                        |      |      |                                        |                        |                        |                        |                          |                        |                    |              |  |
| 37°33'N,<br>127°7'E  | 76                           | 289                 | 870.2                    | 16.6                     | 7.80 | ND                     | 149                       | 1.88                   | 2.43 | 1.39 | 1.90                                   | 0.47                   | 0.73                   | 0.86                   | 1.33                     | 0.13                   | BDL                | 13.92        |  |
| 37°31'N,<br>127°5'E  | 69                           | 89                  | 135.7                    | 11.4                     | 7.45 | 10.67                  | 164                       | 1.92                   | 2.09 | 1.44 | 1.81                                   | 0.48                   | 0.79                   | 0.92                   | 1.40                     | 0.07                   | BDL                | 7.29         |  |
| 37°32'N,<br>127°2'E  | 67                           | 774                 | 695.9                    | 47.1                     | 7.36 | 9.95                   | 210                       | 1.99                   | 1.97 | 1.53 | 1.89                                   | 0.69                   | 1.20                   | 1.40                   | 1.84                     | 0.26                   | BDL                | 8.48         |  |
| 37°32'N,<br>127°1'E  | 64                           | 7979                | 3088.2                   | 199.4                    | ND   | 5.87                   | 556                       | 4.16                   | 1.23 | 1.75 | 2.11                                   | 1.16                   | 2.20                   | 3.70                   | 5.43                     | 7.30                   | 0.31               | ND           |  |
| 37°31'N,<br>127°0'E  | 63                           | 1661                | ND                       | ND                       | ND   | 8.59                   | 224                       | 2.07                   | 1.65 | 1.58 | 2.00                                   | 0.72                   | 1.26                   | 1.64                   | 1.99                     | 0.73                   | BDL                | 11.54        |  |
| 37°31'N,<br>126°57'E | 57                           | 2713                | 1758.5                   | 69.7                     | ND   | 7.67                   | 243                       | 2.03                   | 1.63 | 1.56 | 0.39                                   | 0.81                   | 1.44                   | 1.83                   | 2.47                     | 0.58                   | 0.18               | 5.99         |  |
| 37°32'N,<br>126°55'E | 53                           | 2741                | 1257.3                   | 88.5                     | ND   | 7.15                   | 253                       | 2.11                   | 1.81 | 1.56 | 2.07                                   | 0.86                   | 1.53                   | 1.84                   | 2.32                     | 0.62                   | 0.21               | 18.89        |  |
| 37°33'N,<br>126°53'E | 50                           | 2150                | 776.2                    | 78.7                     | 7.40 | 7.21                   | 262                       | 2.08                   | 1.88 | 1.57 | 2.08                                   | 0.87                   | 1.53                   | 1.82                   | 2.28                     | 0.53                   | 0.21               | 23.37        |  |
| Tributary            |                              |                     |                          |                          |      |                        |                           |                        |      |      |                                        |                        |                        |                        |                          |                        |                    |              |  |
| 37°30'N,<br>127°5'E  | 68                           | 4828                | 368.9                    | 181.3                    | 5.87 | ND                     | 520                       | 3.79                   | 1.68 | 1.67 | 2.19                                   | 1.13                   | 2.15                   | 3.03                   | 4.49                     | 0.60                   | 0.18               | 6.43         |  |
| 37°33'N,<br>127°2'E  | 66                           | 8206                | 1320.5                   | 165.7                    | 5.78 | ND                     | 524                       | 3.86                   | 1.24 | 1.79 | 2.11                                   | 1.26                   | 2.42                   | 4.01                   | 6.19                     | 6.42                   | 0.23               | 5.83         |  |
| 37°32'N,<br>126°52'E | 48                           | 2120                | 4344.9                   | 389.9                    | 7.36 | ND                     | 656                       | 4.74                   | 0.94 | 1.72 | 2.16                                   | 1.01                   | 1.96                   | 3.48                   | 5.95                     | 0.93                   | BDL                | 60.04        |  |

Values below detection limits are indicated by BDL, while ND refers to values not determined.



41 **Table S8.**  $\delta^{13}\text{C}$  in dissolved  $\text{CO}_2$  and  $\text{CH}_4$  collected during a boat cruise conducted along the lower Han River in June  
 42 2016.

| Coordinates       | Distance<br>to mouth (km) | $\delta^{13}\text{C}_{\text{CO}_2}$ (‰) | $\delta^{13}\text{C}_{\text{CH}_4}$ (‰) |
|-------------------|---------------------------|-----------------------------------------|-----------------------------------------|
| Mainstem          |                           |                                         |                                         |
| 37°33'N, 127°7'E  | 76                        | -20.87                                  | -43.78                                  |
| 37°31'N, 127°5'E  | 69                        | ND                                      | -36.59                                  |
| 37°32'N, 127°2'E  | 67                        | -19.15                                  | ND                                      |
| 37°32'N, 127°1'E  | 64                        | -18.04                                  | -48.62                                  |
| 37°31'N, 127°0'E  | 63                        | -17.73                                  | ND                                      |
| 37°31'N, 126°57'E | 57                        | -17.39                                  | -36.38                                  |
| 37°32'N, 126°55'E | 53                        | -16.68                                  | -35.60                                  |
| 37°33'N, 126°53'E | 50                        | -16.73                                  | -32.59                                  |
| Tributary         |                           |                                         |                                         |
| 37°30'N, 127°5'E  | 68                        | -18.33                                  | -52.14                                  |
| 37°33'N, 127°2'E  | 66                        | -18.20                                  | -45.89                                  |
| 37°32'N, 126°52'E | 48                        | -14.69                                  | -45.86                                  |

43 ND indicates values not determined.

44

45 **S2: Supplementary figure**

46 **Fig. S1.** Seasonal mean concentrations of 3 GHGs measured at 6 sites across the Han River basin. Error bars indicate one  
47 standard deviation. Monitored seasons include: summer (July 2014 and June and July 2015 for CO<sub>2</sub>; and June and July  
48 2015 for CH<sub>4</sub> and N<sub>2</sub>O), fall (September–November 2014), winter (December 2014), and spring (March–May 2015 for  
49 CO<sub>2</sub>; March 2015 for CH<sub>4</sub> and N<sub>2</sub>O). Note that CH<sub>4</sub> concentrations at HR1 were lower than 10 nmol L<sup>-1</sup>.

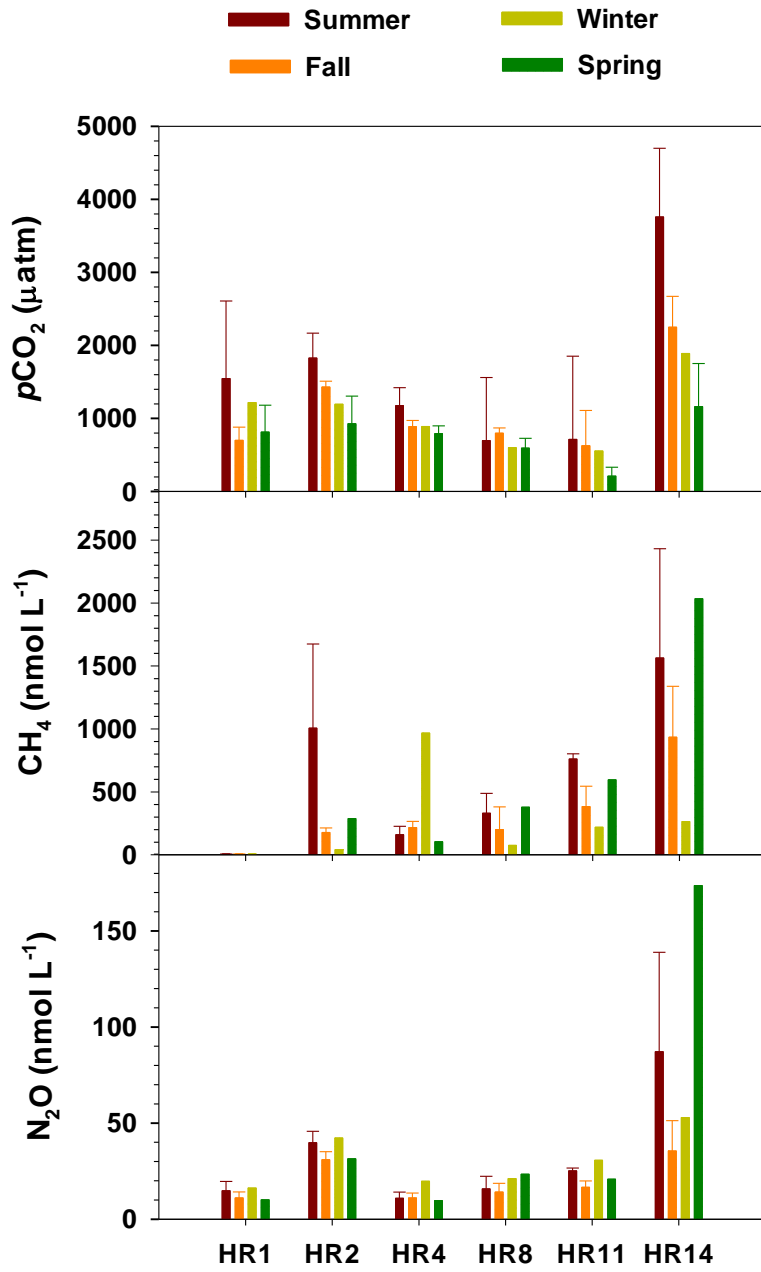

50

51 Fig. S1
